# Supplementary material for: Co3S4 hollow nanospheres grown on graphene as advanced electrode materials for supercapacitors
Source: Royal Society of Chemistry journal article supplement (doi:10.1039/c2jm34714h), 2012-01-01
Supplement: c2jm34714h.pdf [file c2jm34714h.pdf]

## Supporting Information

---

### **Co<sub>3</sub>S<sub>4</sub> hollow nanospheres grown on graphene as advanced supercapacitor materials**

**Qinghong Wang, Lifang Jiao,\* Hongmei Du, Yuchang Si, Yijing Wang, Huatang Yuan**

*<sup>a</sup>Institute of New Energy Material Chemistry, Key Laboratory of Advanced Energy Materials Chemistry (MOE), Nankai University, Tianjin 300071, P.R. China, Tel.: +86 22 23498089; fax: +86 22 23502604; Email: [jiaolf@nankai.edu.cn](mailto:jiaolf@nankai.edu.cn)*

#### **Experimental section**

##### **Synthesis of Co<sub>3</sub>S<sub>4</sub>/rGO composites**

The preparation of the Co<sub>3</sub>S<sub>4</sub>/rGO nanocomposite involves two steps: synthesis of a Co(OH)<sub>2</sub>/GO composite and reaction of the composite with sodium sulfide.

GO was synthesized via a modified Hummers method. In a typical synthesis of the composite, 0.04 g of graphene oxide was dispersed in 50 mL of ethanol by sonication for 2 h to form a homogeneous GO suspension. Then 10 mL of ethanol containing 0.6 g of CoCl<sub>2</sub>·6H<sub>2</sub>O and 10 mL of H<sub>2</sub>O containing 2 mL of ammonia solution (NH<sub>3</sub>·H<sub>2</sub>O, 25 wt%) were slowly added into the above suspension. After stirring for 10 min, the solution was then sealed in a 100 mL Teflon lined stainless steel autoclave for hydrothermal reaction at 180 °C for 5 h. The Co(OH)<sub>2</sub>/GO precipitate was collected by centrifugation, washed with water for several times and dried at 60 °C in a vacuum for 10 h. Afterwards, 0.3 g of the as-obtained Co(OH)<sub>2</sub>/GO was dispersed in 90 mL of ethylene glycol (EG) solution by sonication followed by the addition of 10 mL of H<sub>2</sub>O containing 5 g of Na<sub>2</sub>S·9H<sub>2</sub>O under vigorous stirring. Then

the black suspension was transferred into a three-neck flask, heated and refluxed at 160 °C for 16 h. Finally, the black precipitate was washed with deionized water and ethanol for several times and dried at 60 °C for 10 h in a vacuum oven, and the final Co<sub>3</sub>S<sub>4</sub>/rGO nanocomposite was obtained. Different amounts of GO were added to adjust the content of rGO in the composites. For comparison, Co<sub>3</sub>S<sub>4</sub> hollow nanospheres were also prepared following the same procedure but without adding GO.

### **Materials characterization**

The crystallographic information of samples was gathered by powder X-ray diffraction (XRD) on a Rigaku D/Max-2500 powder diffractometer (Cu K $\alpha$  radiation,  $\lambda$ =0.15418 nm). The morphologies were characterized by field emission scanning electron microscopy (FESEM; JEOL JSM-6700F), transmission electron microscope (TEM) and high-resolution TEM (HRTEM; Tecnai G2 F20). The electronic state of the elements of the as-prepared samples was analyzed by X-ray photoelectron spectroscopy (XPS; Kratos Axis Ultra DLD using Al K $\alpha$  radiation). All the binding energy values were calibrated by using C 1s at 284.6 eV as a reference. The elemental composition was determined by inductively coupled plasma atomic emission spectroscopy (ICP-AES, USA Thermo Jarrel-Ash Corp. instrument). The specific surface area was calculated using the Brunauer-Emmett-Teller (BET) method (Micromeritics Tristar-3000 surface area and porosity analyzer).

### **Electrochemical measurements**

The working electrodes were fabricated by mixing the active material (the  $\text{Co}_3\text{S}_4/\text{rGO}$  composite or  $\text{Co}_3\text{S}_4$  HNSs), graphite, acetylene black and polytetrafluoroethylene (PTFE) binder in a weight ratio of 70:10:10:10. The first three components were mixed together in an agate mortar until homogeneous black powder was achieved. PTFE was then added to the mixture with a few drops of ethanol. The formed paste was pressed at 20 MPa to a piece of nickel foam (1.0 cm×1.0 cm), and dried under vacuum at 60 °C for 10 h. Electrochemical measurements were conducted in a three-electrode arrangement in 2 M KOH electrolyte. A bright Pt plate and Hg/HgO electrode were used as the counter electrode and reference electrode, respectively. Cyclic voltammetry (CV) was conducted with a Zahner IM6e electrochemical workstation with voltage scan rates of 5, 10, 20 and 50  $\text{mV s}^{-1}$ . The galvanostatic charge-discharge tests were conducted on a LAND battery system at the current densities of 0.5, 1.0, 2.0 and 5.0  $\text{A g}^{-1}$ . The specific capacitance is calculated according to the following equation:

$$C = \frac{I\Delta t}{m\Delta V} \quad (1)$$

where  $C$  ( $\text{F g}^{-1}$ ) is the specific capacitance,  $I$  (A) represents the discharge current, and  $m$  (g),  $\Delta V$  (V) and  $\Delta t$  (s) designate mass of active materials, potential drop during discharge and total discharge time, respectively. Electrochemical impedance spectroscopy (EIS) was performed with a Zahner IM6e electrochemical workstation with 5 mV amplitude in a frequency range from  $10^{-2}$  Hz to  $10^5$  Hz at open circuit potential.

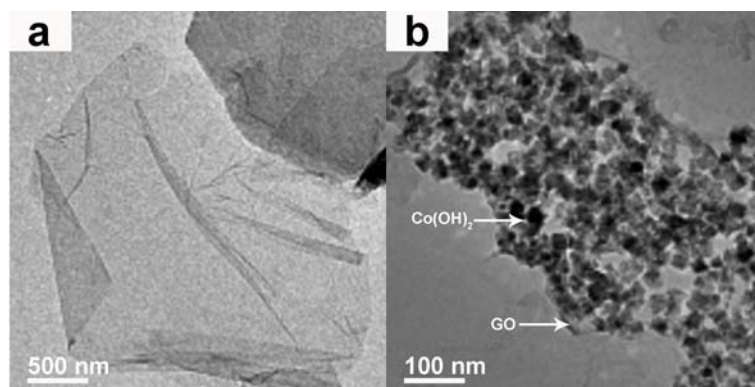

**Fig. S1** TEM images of (a) the as-prepared GO sheets and (b)  $\text{Co(OH)}_2/\text{GO}$  precursor.

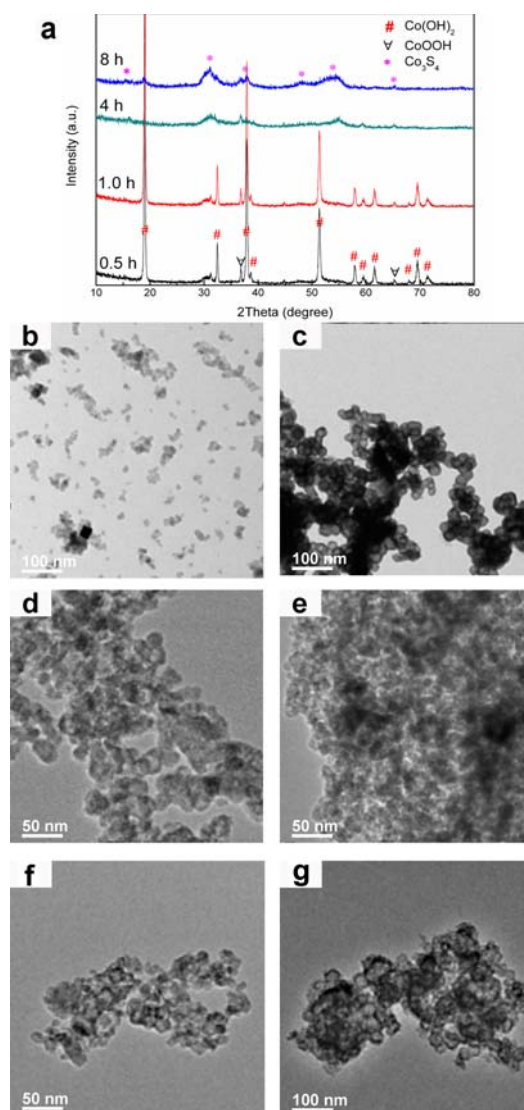

**Fig. S2** The formation process of  $\text{Co}_3\text{S}_4$  hollow nanospheres. (a) XRD patterns of the intermediate products obtained at different reflux time, (b) TEM image of the  $\text{Co(OH)}_2$  precursor, and TEM images of the intermediate products obtained at reaction time: (c) 1 h, (d) 2h, (e) 4h, (f) 8 h and (g) 12 h.

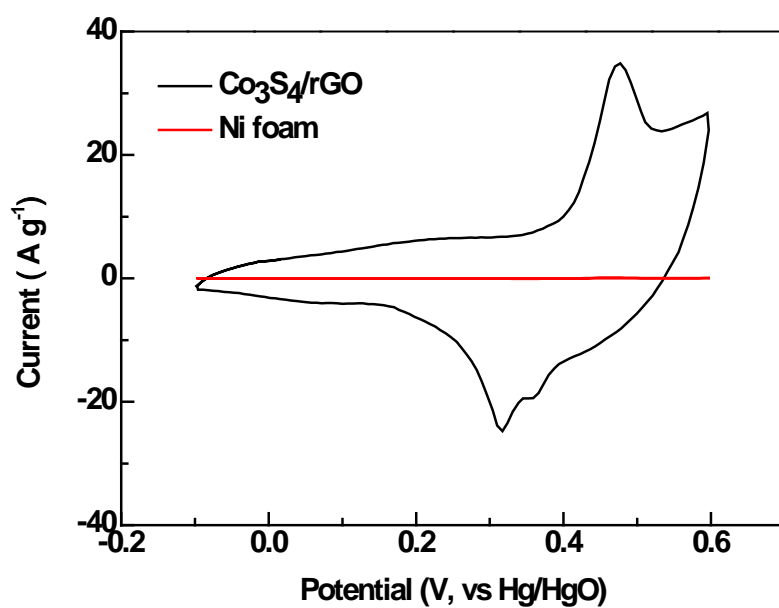

**Fig. S3** The CV curves of Ni foam with and without loading of Co<sub>3</sub>S<sub>4</sub>/rGO composite, 20 mV s<sup>-1</sup>.

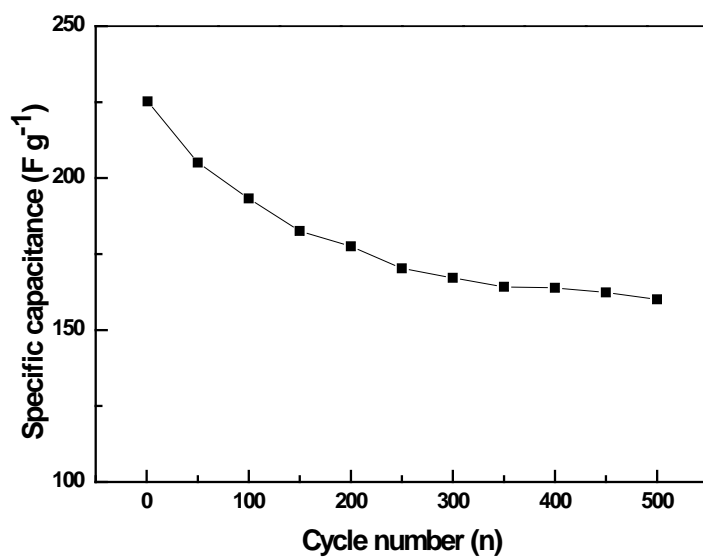

**Fig. S4** Cycle life of rGO at 0.5 A g<sup>-1</sup>.
